# Supplementary material for: The Hydrogen Bike: Communicating the Production and Safety of Green Hydrogen
Source: Frontiers journal article supplement (doi:10.3389/fcomm.2020.540635), 2021-03-10
Supplement: Table_1.docx [file Table_1.docx]

ESI

*The Hydrogen Bike*: Communicating the Production and Safety of Green Hydrogen

Table ESI1 provides raw data from each event attended by The Hydrogen Bike. Tokens handed out are one of three colours. Tokens can be returned to one of five tubes, labelled with an emoticon.

:)) :) :| :( and :(( represent the dark green, light green, yellow, orange and red faces on the tubes in Figure 2 respectively.

| Wales on Wheels | Feedback Emoticon | | | | |
| --- | --- | --- | --- | --- | --- |
| :)) | :) | :| | :( | :(( |
| Red Token | 2 | 2 | 1 | 0 | 0 |
| Yellow Token | 10 | 6 | 0 | 0 | 0 |
| Green Token | 21 | 0 | 0 | 0 | 0 |
|  |  | | | | |
| Swansea Clean Air Show | Feedback Emoticon | | | | |
| :)) | :) | :| | :( | :(( |
| Red Token | 5 | 1 | 1 | 0 | 1 |
| Yellow Token | 48 | 13 | 6 | 2 | 1 |
| Green Token | 14 | 2 | 0 | 0 | 0 |
|  |  | | | | |
| Eisteddfod 2018 | Feedback Emoticon | | | | |
| :)) | :) | :| | :( | :(( |
| Red Token | 20 | 5 | 1 | 1 | 2 |
| Yellow Token | 286 | 50 | 23 | 0 | 4 |
| Green Token | 64 | 9 | 1 | 0 | 0 |
|  |  | | | | |
| Your Green Future | Feedback Emoticon | | | | |
| :)) | :) | :| | :( | :(( |
| Red Token | 9 | 7 | 2 | 1 | 1 |
| Yellow Token | 88 | 78 | 21 | 1 | 0 |
| Green Token | 36 | 0 | 0 | 0 | 0 |
|  |  | | | | |
| Swansea Science Fest | Feedback Emoticon | | | | |
| :)) | :) | :| | :( | :(( |
| Red Token | 42 | 3 | 4 | 1 | 7 |
| Yellow Token | 350 | 71 | 30 | 3 | 7 |
| Green Token | 186 | 16 | 1 | 1 | 8 |
|  |  | | | | |

| Low Carbon Heating | Feedback Emoticon | | | | |
| --- | --- | --- | --- | --- | --- |
| :)) | :) | :| | :( | :(( |
| Red Token | 0 | 0 | 0 | 0 | 0 |
| Yellow Token | 2 | 1 | 5 | 0 | 0 |
| Green Token | 33 | 1 | 0 | 0 | 0 |
|  |  | | | | |
| Big Bang Fair Day 1 | Feedback Emoticon | | | | |
| :)) | :) | :| | :( | :(( |
| Red Token | 22 | 7 | 2 | 0 | 0 |
| Yellow Token | 271 | 147 | 41 | 6 | 32 |
| Green Token | 63 | 12 | 4 | 0 | 0 |
|  |  | | | | |
| Big Bang Fair Day 2 | Feedback Emoticon | | | | |
| :)) | :) | :| | :( | :(( |
| Red Token | 73 | 11 | 2 | 0 | 2 |
| Yellow Token | 343 | 137 | 59 | 11 | 5 |
| Green Token | 13 | 18 | 2 | 0 | 4 |
|  | | | | | |
| Big Bang Fair Day 3 | Feedback Emoticon | | | | |
| :)) | :) | :| | :( | :(( |
| Red Token | 33 | 13 | 7 | 0 | 5 |
| Yellow Token | 382 | 149 | 64 | 6 | 13 |
| Green Token | 92 | 21 | 5 | 1 | 1 |
|  | | | | | |
| Big Bang Fair Day 4 | Feedback Emoticon | | | | |
| :)) | :) | :| | :( | :(( |
| Red Token | 54 | 14 | 1 | 0 | 4 |
| Yellow Token | 555 | 12 | 48 | 3 | 4 |
| Green Token | 134 | 141 | 4 | 0 | 2 |

Table ESI1. Raw data The Hydrogen Bike events.
